# Supplementary material for: Phosphorylation of NR2B NMDA subunits by protein kinase C in arcuate nucleus contributes to inflammatory pain in rats
Source: PubMed Central journal article supplement (PMC4626761; doi:10.1038/srep15945), 2015-10-30
Supplement: srep15945-s1.pdf [file srep15945-s1.pdf]

**Supplemental Materials**

**Phosphorylation of NR2B NMDA subunits by protein kinase C in arcuate nucleus contributes to inflammatory pain in rats**

Fan Bu, Huiyu Tian, Shan Gong, Qi Zhu, Guang-Yin Xu, Jin Tao, Xinghong Jiang

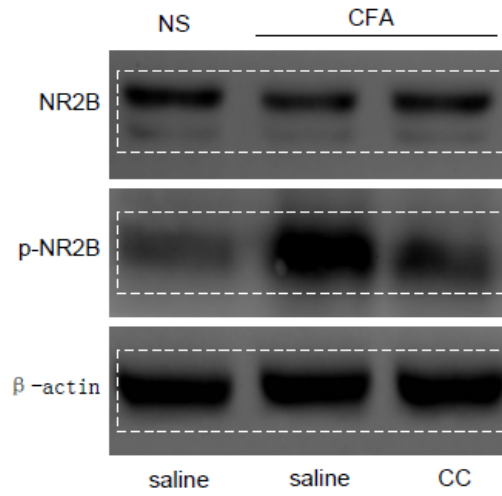

**Fig. S1: Full-length blots for NR2B expression in ARC.** Shown is the expanded image of western blot for NR2B against a loading control, GAPDH, presented in Fig. 4A. The Blot is representative of three experiments.

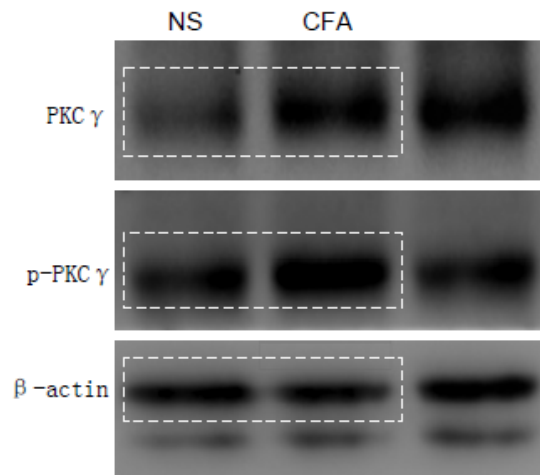

**Fig. S2: Full-length blots for PKC $\gamma$  expression in ARC.** Shown is the expanded image of western blot for PKC $\gamma$  against a loading control, GAPDH, presented in Fig. 5A. Blot is representative of three experiments.
